# Supplementary material
Source: PubMed Central journal article supplement (PMC5466022)
Supplement: supp_tpc.16.00613_TPC2016-00613-LSBR2_Supplemental_Data.pdf [file supp_tpc.16.00613_TPC2016-00613-LSBR2_Supplemental_Data.pdf]

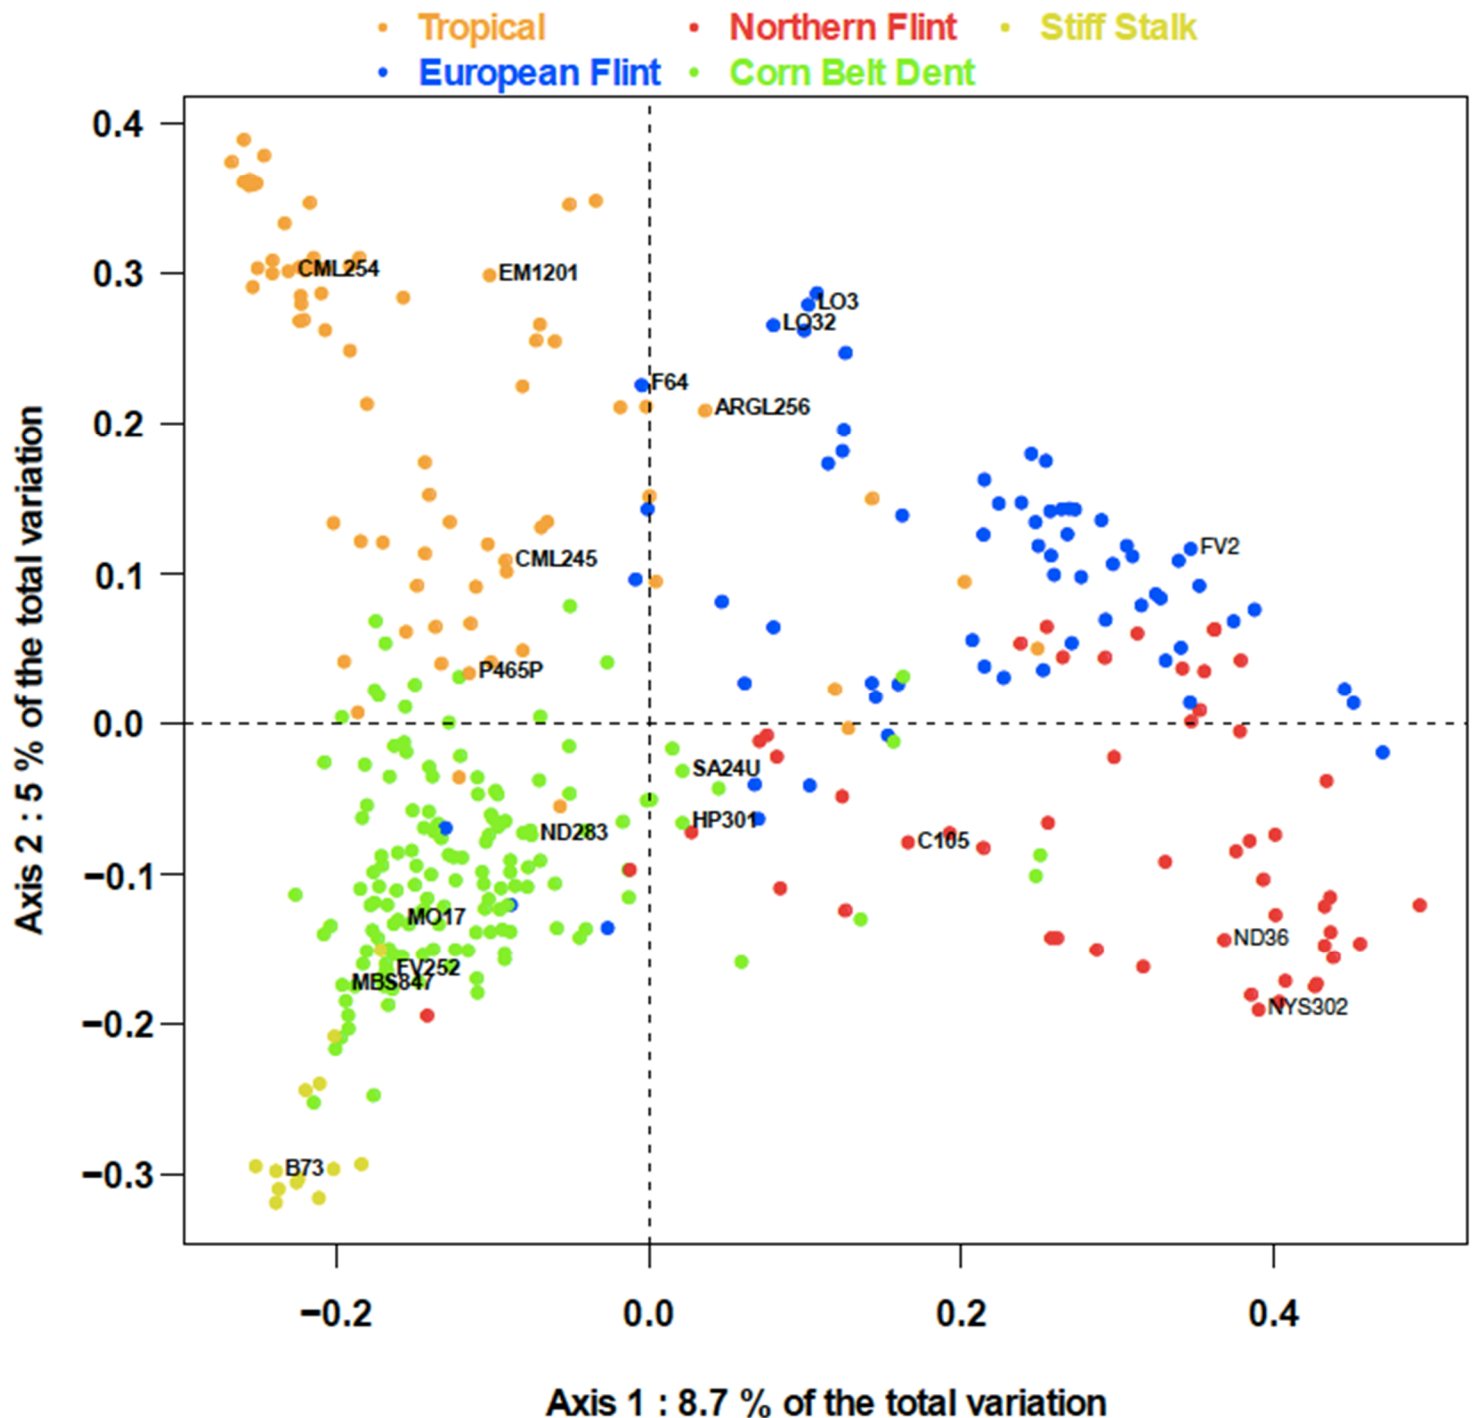

**Supplemental Figure 1.** Genetic relatedness of the 19 maize lines within the origin of the five groups of lines.

(Supports Figures 2, 3, 4.)

The tropical, European Flint, Northern Flint, Corn Belt Dent and Stiff Stalk lines were originally defined by Camus-Kulandaivelu et al. (2006) and classified within the S1P9 genetic diversity panel on the basis of their genetic relatedness using SSR markers (see Supplemental Table 1 for details).

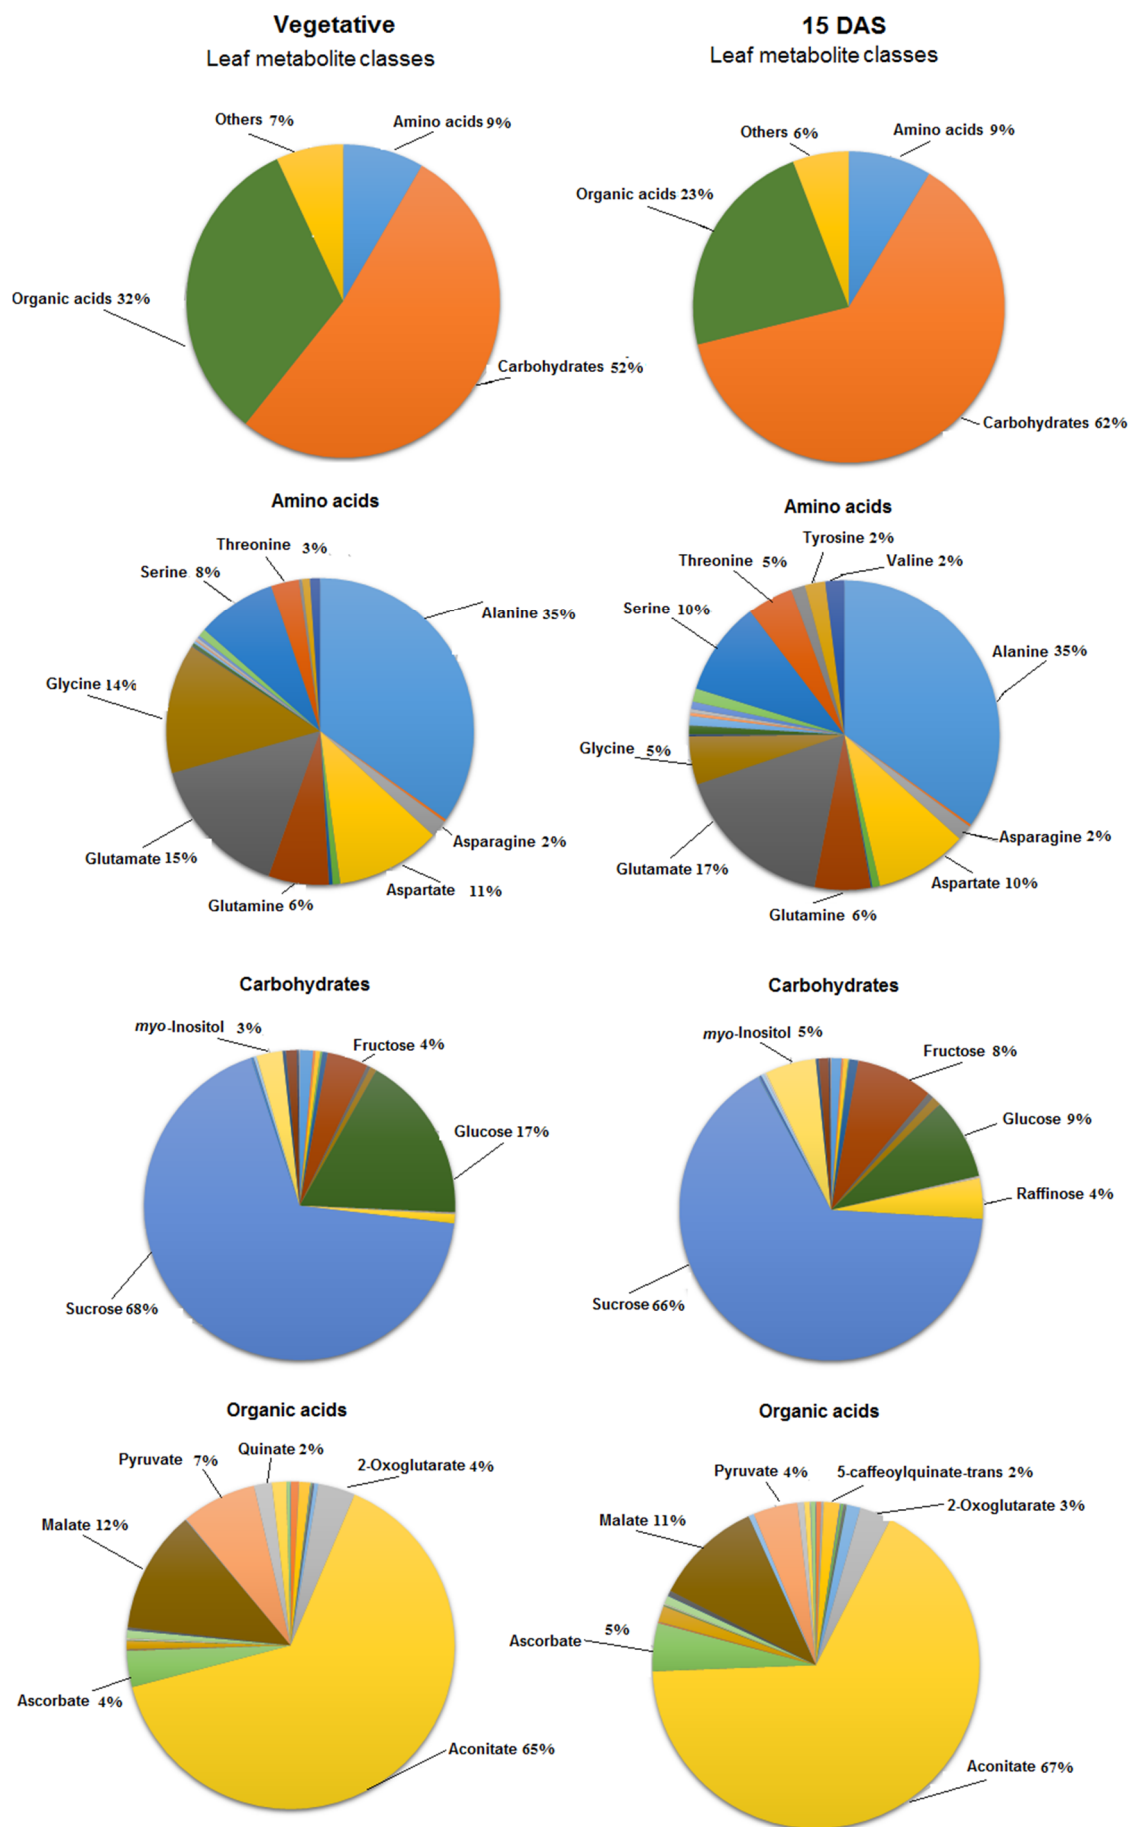

**Supplemental Figure 2A.** Average proportions of different metabolite classes in the 19 maize lines representative of American and European plant diversity.

(Supports Figure 1.)

Plants were grown in the field under non-limiting N feeding conditions. Metabolite content was determined by GC-MS analysis at the vegetative stage (V) on a fully developed young leaf and at the grain filling stage (15 DAS) on the leaf below the ear.

**Amino acids**

|              |             |              |                  |              |            |
|--------------|-------------|--------------|------------------|--------------|------------|
| ■ Alanine    | ■ β-Alanine | ■ Glycine    | ■ Lysine         | ■ Proline    | ■ Tyrosine |
| ■ Arginine   | ■ GABA      | ■ Histidine  | ■ Methionine     | ■ Serine     | ■ Valine   |
| ■ Asparagine | ■ Glutamine | ■ Isoleucine | ■ O-Acetylserine | ■ Threonine  |            |
| ■ Aspartate  | ■ Glutamate | ■ Leucine    | ■ Phenylalanine  | ■ Tryptophan |            |

**Organic acids**

|                                      |                                     |                           |
|--------------------------------------|-------------------------------------|---------------------------|
| ■ 3-caffeoylquininate- <i>cis</i>    | ■ Galactonate                       | ■ Aconitate               |
| ■ 4-caffeoylquininate- <i>trans</i>  | ■ Glycolate                         | ■ Ascorbate               |
| ■ U2846/345 (Coumaroylquininate)     | ■ Itaconate                         | ■ Caffeate                |
| ■ U2976.4/345 (3-Coumaroylquininate) | ■ Maleate                           | ■ Citrate                 |
| ■ U3061.9/345 (Coumaroylquininate)   | ■ Pipecolate                        | ■ Dehydroascorbate        |
| ■ U3126.1/307(Cafeoylquininate)      | ■ Quinate                           | ■ Ferulate - <i>trans</i> |
| ■ U3176.5/249(Ferruloylquininate-2)  | ■ 3-caffeoylquininate- <i>trans</i> | ■ Galactaric acid         |
| ■ 2-oxoglutarate                     | ■ 5-caffeoylquininate- <i>trans</i> | ■ Glycerate               |
| ■ Aminomalonate                      | ■ U2968.9/249 (Ferruloylquininate)  | ■ Glycosylsalicylate      |
| ■ β-hydroxybutyrate                  | ■ U3040/255 (Coumaroylquininate)    | ■ Malate                  |
| ■ Citramalate                        | ■ U3088.4/249(Ferruloylquininate)   | ■ Nicotinate              |
| ■ Coumarate                          | ■ U3151/249&255(Ferruloylquininate) | ■ Pyruvate                |
| ■ Erythronate                        | ■ 2-4-dihydroxybutanoate            | ■ Shikimate               |
| ■ Fumarate                           |                                     |                           |

**Carbohydrates**

|                        |                           |                            |                        |
|------------------------|---------------------------|----------------------------|------------------------|
| ■ β-Sitosterol         | ■ Arabitol                | ■ Stigmasterol             | ■ Glucose              |
| ■ Phytol-2             | ■ Glycerol                | ■ Arabinose                | ■ Maltose              |
| ■ U1824.8/123          | ■ Mannitol                | ■ Dihydroxyacetone-P       | ■ Raffinose            |
| ■ Digalactosylglycerol | ■ Threitol                | ■ Glucose-6-P              | ■ Trehalose            |
| ■ Galactinol           | ■ Fructose-6-P            | ■ Glycerol-2-P             | ■ Xylulose             |
| ■ Galactosylglycerol   | ■ Glycerate-3-P           | ■ <i>myo</i> -Inositol-1-P | ■ Kempferol            |
| ■ Kestose-1            | ■ Glycerol-3P             | ■ Trehalose-6-P            | ■ Erythriol            |
| ■ Mannose              | ■ Rivose-5-P              | ■ U532.8/307               | ■ Inositol-scylo       |
| ■ Sucrose              | ■ U3025.8/204(Galactinol) | ■ U1864.3/307(Ketohexose)  | ■ <i>myo</i> -Inositol |
| ■ Xylose               | ■ U1860.5/217             | ■ Fructose                 |                        |
| ■ U2412.1/157          | ■ Campesterol             | ■ Galactose                |                        |

**Supplemental Figure 2B.** List of metabolites and color codes for Supplemental Figure 2A.  
(Supports Figure 1.)

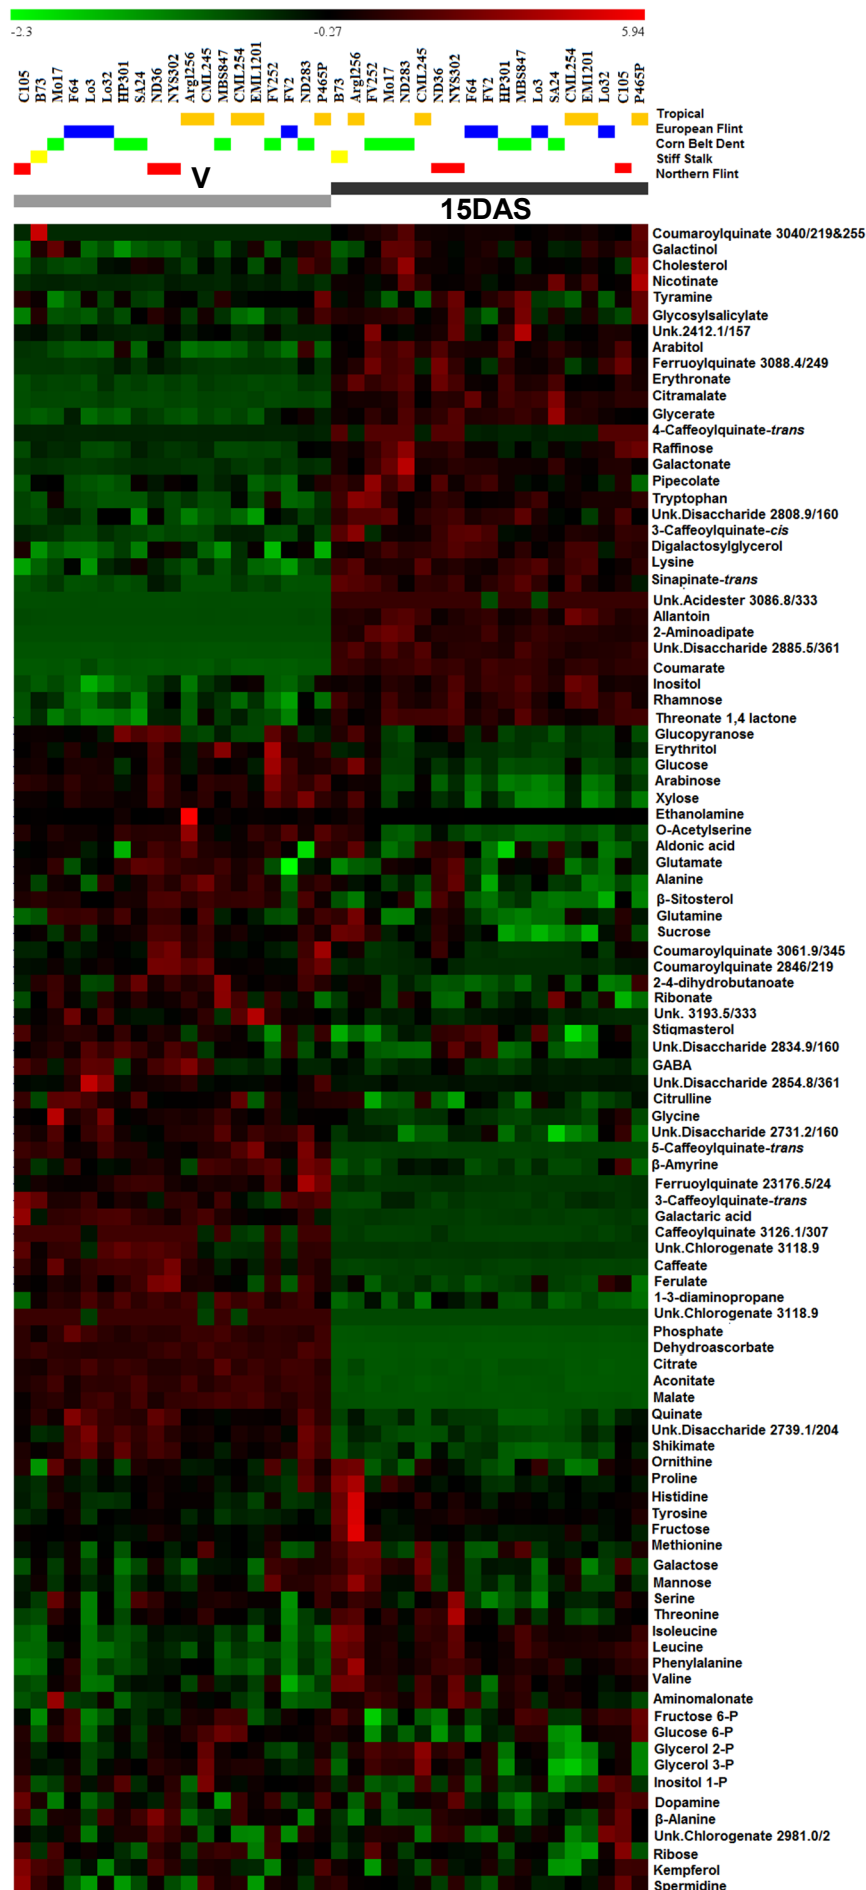

**Supplemental Figure 3.** Hierarchical clustering analysis (HCA) of metabolites and at the V stage and 15 DAS in the 19 maize lines.

(Supports Figure 2 and 3.)

The intensity of the green and red colors correspond to a lower and higher amount of metabolite (scale at the top of the figure).

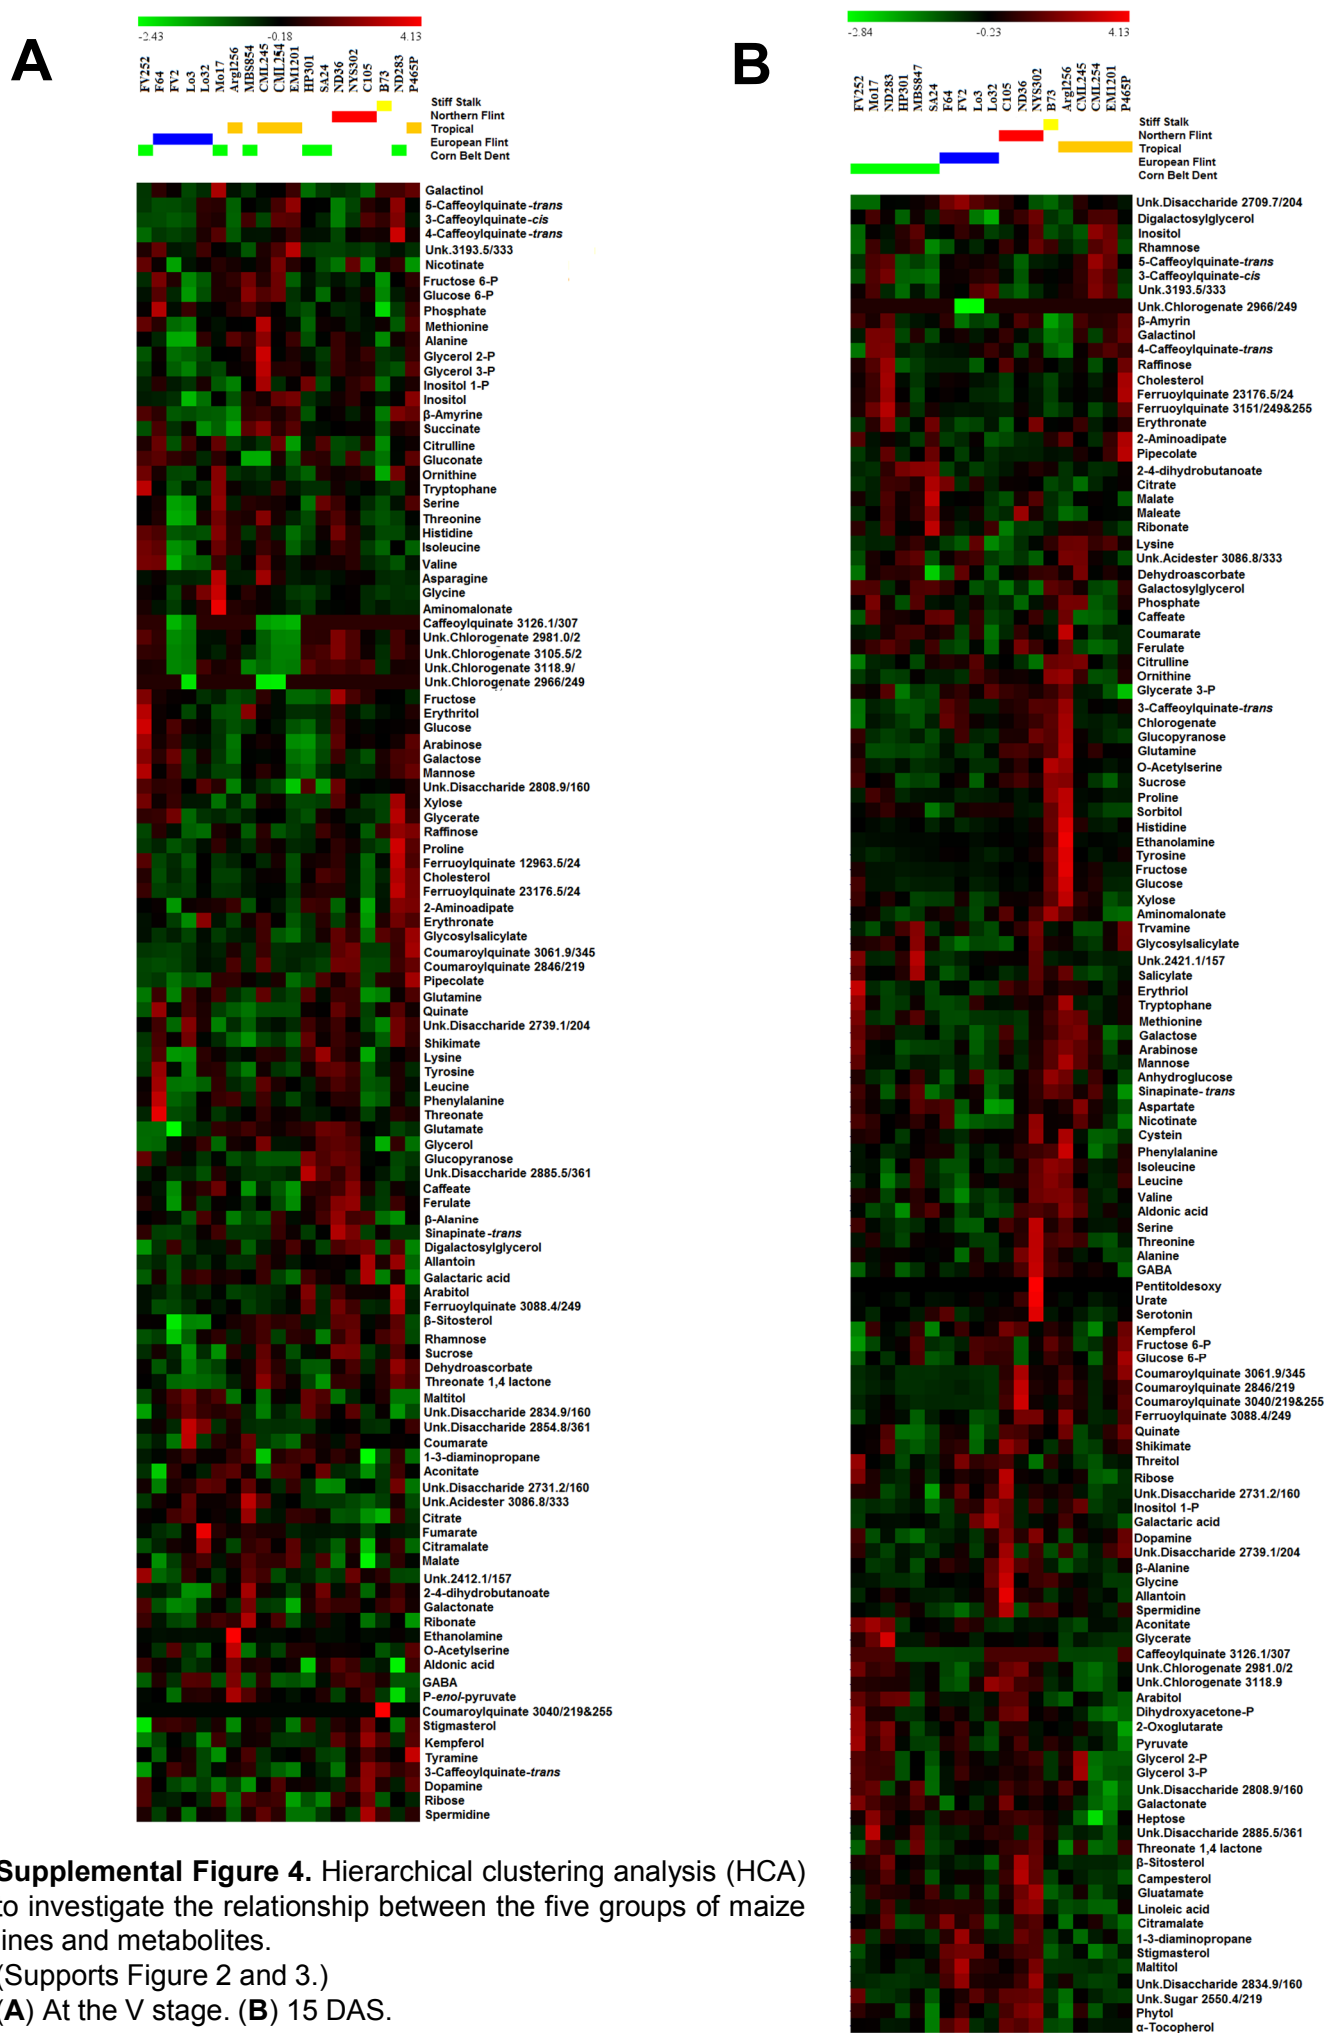

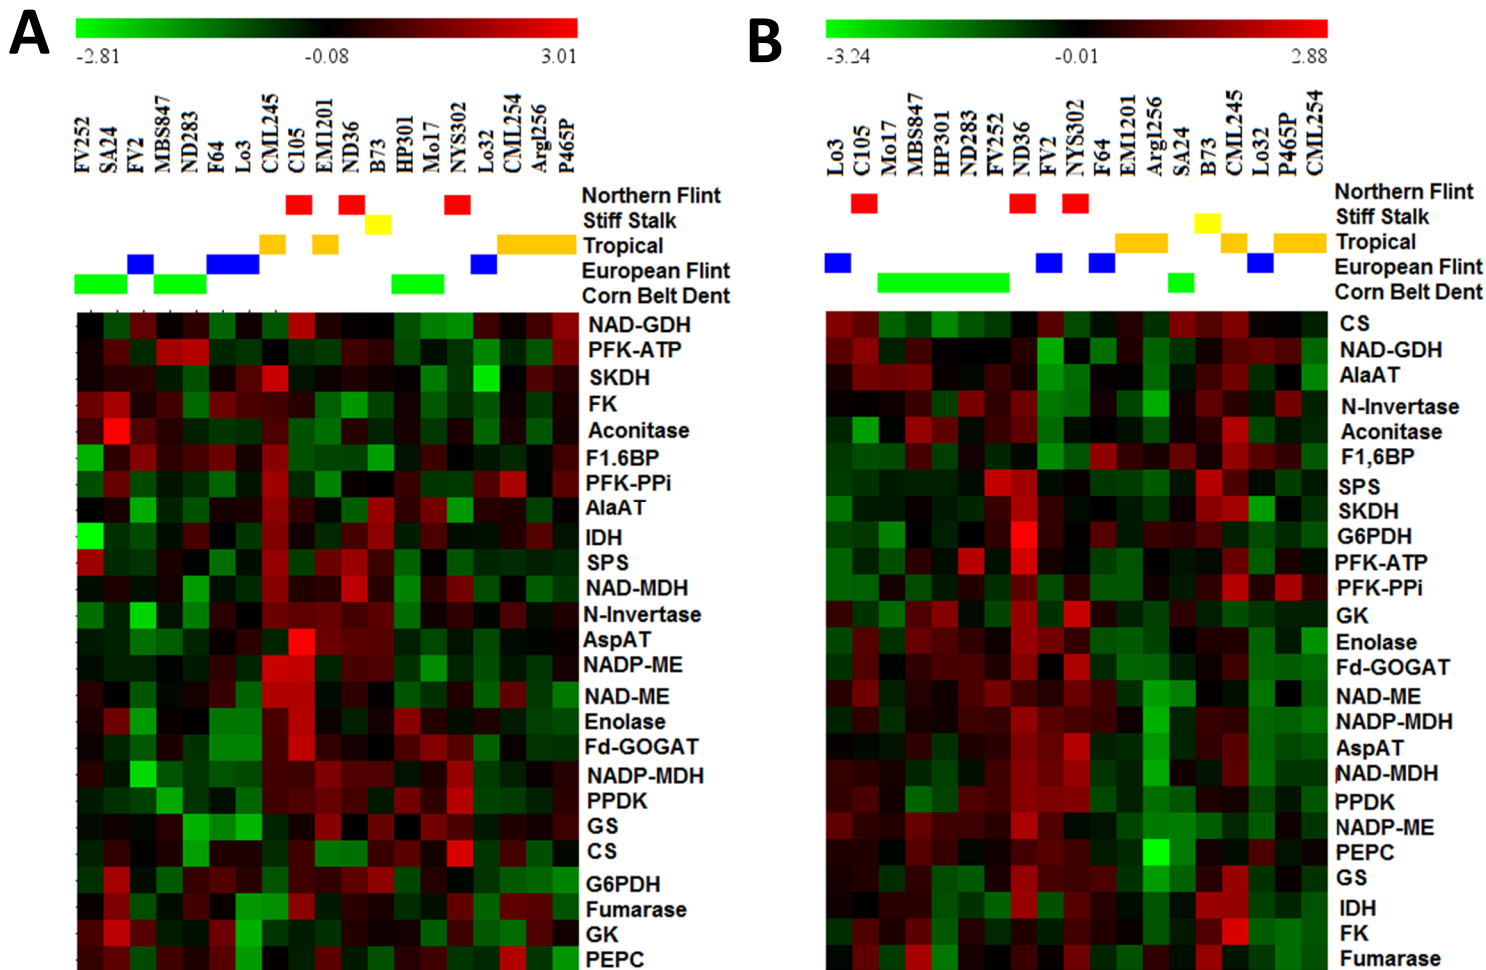

**Supplemental Figure 5.** Hierarchical clustering analysis (HCA) used to investigate the relationship between the five groups of maize lines of the maize lines and enzyme activities.

(Supports Figure 4.)

The intensity of the green and red colors corresponds to lower and higher enzyme activities (scale at the top of the figure). **(A)** At the V stage. **(B)** At 15 DAS.

|         | B73 | FV2    | Lo3    | Lo32   | F64    | EM1201 | CML254 | CML245 | Argl256 | P465P  | ND283  | FV252  | SA24   | Mo17   | MBS847 | HP301  | C105   | ND36   | NYS302 |  |
|---------|-----|--------|--------|--------|--------|--------|--------|--------|---------|--------|--------|--------|--------|--------|--------|--------|--------|--------|--------|--|
| B73     |     | 0.9006 | 0.9725 | 0.9721 | 0.9725 | 0.9709 | 0.9721 | 0.9725 | 0.9108  | 0.9831 | 0.9108 | 0.9709 | 0.9725 | 0.9697 | 0.9198 | 0.9941 | 0.9831 | 0.9100 | 0.9013 |  |
| FV2     |     |        | 0.9006 | 0.9006 | 0.8994 | 0.8998 | 0.9006 | 0.8994 | 0.9104  | 0.9006 | 0.9143 | 0.9013 | 0.9006 | 0.8994 | 0.9013 | 0.9006 | 0.9006 | 0.9175 | 0.9281 |  |
| Lo3     |     |        |        | 0.9823 | 0.9733 | 0.9717 | 0.9733 | 0.9831 | 0.9104  | 0.9721 | 0.9096 | 0.9713 | 0.9957 | 0.9693 | 0.9194 | 0.9725 | 0.9721 | 0.9100 | 0.9013 |  |
| Lo32    |     |        |        |        | 0.9725 | 0.9717 | 0.9733 | 0.9733 | 0.9100  | 0.9729 | 0.9068 | 0.9697 | 0.9823 | 0.9709 | 0.9194 | 0.9729 | 0.9721 | 0.9100 | 0.9013 |  |
| F64     |     |        |        |        |        | 0.9721 | 0.9733 | 0.9725 | 0.9100  | 0.9725 | 0.9084 | 0.9713 | 0.9725 | 0.9709 | 0.9198 | 0.9725 | 0.9725 | 0.9088 | 0.9013 |  |
| EM1201  |     |        |        |        |        |        | 0.9717 | 0.9717 | 0.9084  | 0.9721 | 0.9088 | 0.9697 | 0.9717 | 0.9709 | 0.9206 | 0.9721 | 0.9721 | 0.9096 | 0.9009 |  |
| CML254  |     |        |        |        |        |        |        | 0.9725 | 0.9104  | 0.9721 | 0.9061 | 0.9705 | 0.9733 | 0.9705 | 0.9194 | 0.9721 | 0.9721 | 0.9072 | 0.9013 |  |
| CML245  |     |        |        |        |        |        |        |        | 0.9104  | 0.9729 | 0.9072 | 0.9701 | 0.9831 | 0.9693 | 0.9194 | 0.9733 | 0.9725 | 0.9100 | 0.9013 |  |
| Argl256 |     |        |        |        |        |        |        |        |         | 0.9100 | 0.9289 | 0.9104 | 0.9104 | 0.9068 | 0.9108 | 0.9100 | 0.9100 | 0.9261 | 0.9123 |  |
| P465P   |     |        |        |        |        |        |        |        |         |        | 0.9088 | 0.9697 | 0.9721 | 0.9796 | 0.9296 | 0.9733 | 0.9839 | 0.9100 | 0.9013 |  |
| ND283   |     |        |        |        |        |        |        |        |         |        |        | 0.9198 | 0.9068 | 0.9072 | 0.9100 | 0.9092 | 0.9096 | 0.9316 | 0.9159 |  |
| FV252   |     |        |        |        |        |        |        |        |         |        |        |        | 0.9701 | 0.9689 | 0.9178 | 0.9697 | 0.9697 | 0.9100 | 0.9013 |  |
| SA24    |     |        |        |        |        |        |        |        |         |        |        |        |        | 0.9705 | 0.9194 | 0.9725 | 0.9729 | 0.9076 | 0.9013 |  |
| Mo17    |     |        |        |        |        |        |        |        |         |        |        |        |        |        | 0.9269 | 0.9709 | 0.9697 | 0.9084 | 0.9006 |  |
| MBS847  |     |        |        |        |        |        |        |        |         |        |        |        |        |        |        |        |        |        |        |  |
| 7       |     |        |        |        |        |        |        |        |         |        |        |        |        |        |        |        |        |        |        |  |
| HP301   |     |        |        |        |        |        |        |        |         |        |        |        |        |        |        | 0.9198 | 0.9198 | 0.9119 | 0.9017 |  |
| C105    |     |        |        |        |        |        |        |        |         |        |        |        |        |        |        |        | 0.9823 | 0.9096 | 0.9006 |  |
| ND36    |     |        |        |        |        |        |        |        |         |        |        |        |        |        |        |        |        | 0.9096 | 0.9006 |  |
| NYS302  |     |        |        |        |        |        |        |        |         |        |        |        |        |        |        |        |        |        | 0.9190 |  |

**Supplemental Figure 6.** Metabolism similarity matrix indicating the ratio of active reactions with shared flux ranges between the 19 maize lines in a pairwise manner.

(Supports Figure 5.)

Regulation was imposed on the genome-scale leaf model based on enzyme activities. The flux range of each reaction was determined for each maize line at the time of maximum biomass production. The flux ranges were then compared between two maize lines to determine the number of overlapping flux ranges compared to the total number of reactions active in either maize line. The background color within the figure represents the similarity of each pair of maize lines compared to all other pairs with green indicating very similar, yellow moderately similar, and pale orange dissimilar. The vertical and horizontal green, blue, orange, red and yellow boxes represent the five groups of maize lines in different countries of Europe and America (Stiff Stalk: yellow; European Flint: Blue; Tropical: Orange; Corn Belt Dent: green and Northern Flint: red).

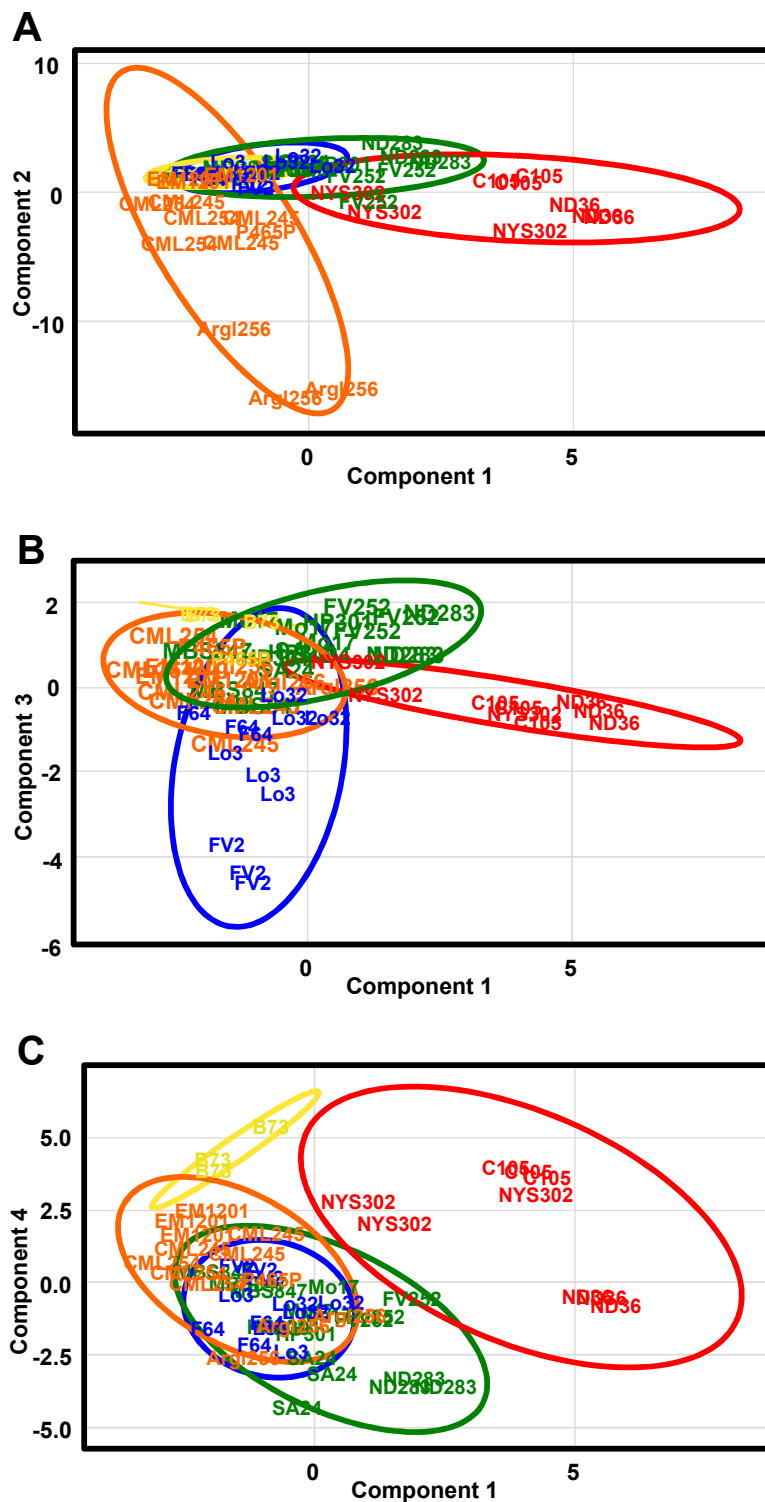

**Supplemental Figure 7.** The five groups of maize lines identified by means of specific leaf metabolic signature during the grain filling period.

(Supports Figure 3.)

Example of representation in sPLS-DA of metabolites 15 DAS. **(A)** using component 1 and component 2. **(B)** using component 1 and component 3. **(C)** using component 1 and component 4. The green, blue, orange, red and yellow colors represent the five groups of maize lines in different countries of Europe and America (Tropical: Orange; European Flint: Blue; Northern Flint: red; Corn Belt Dent: green and Stiff Stalk: yellow).



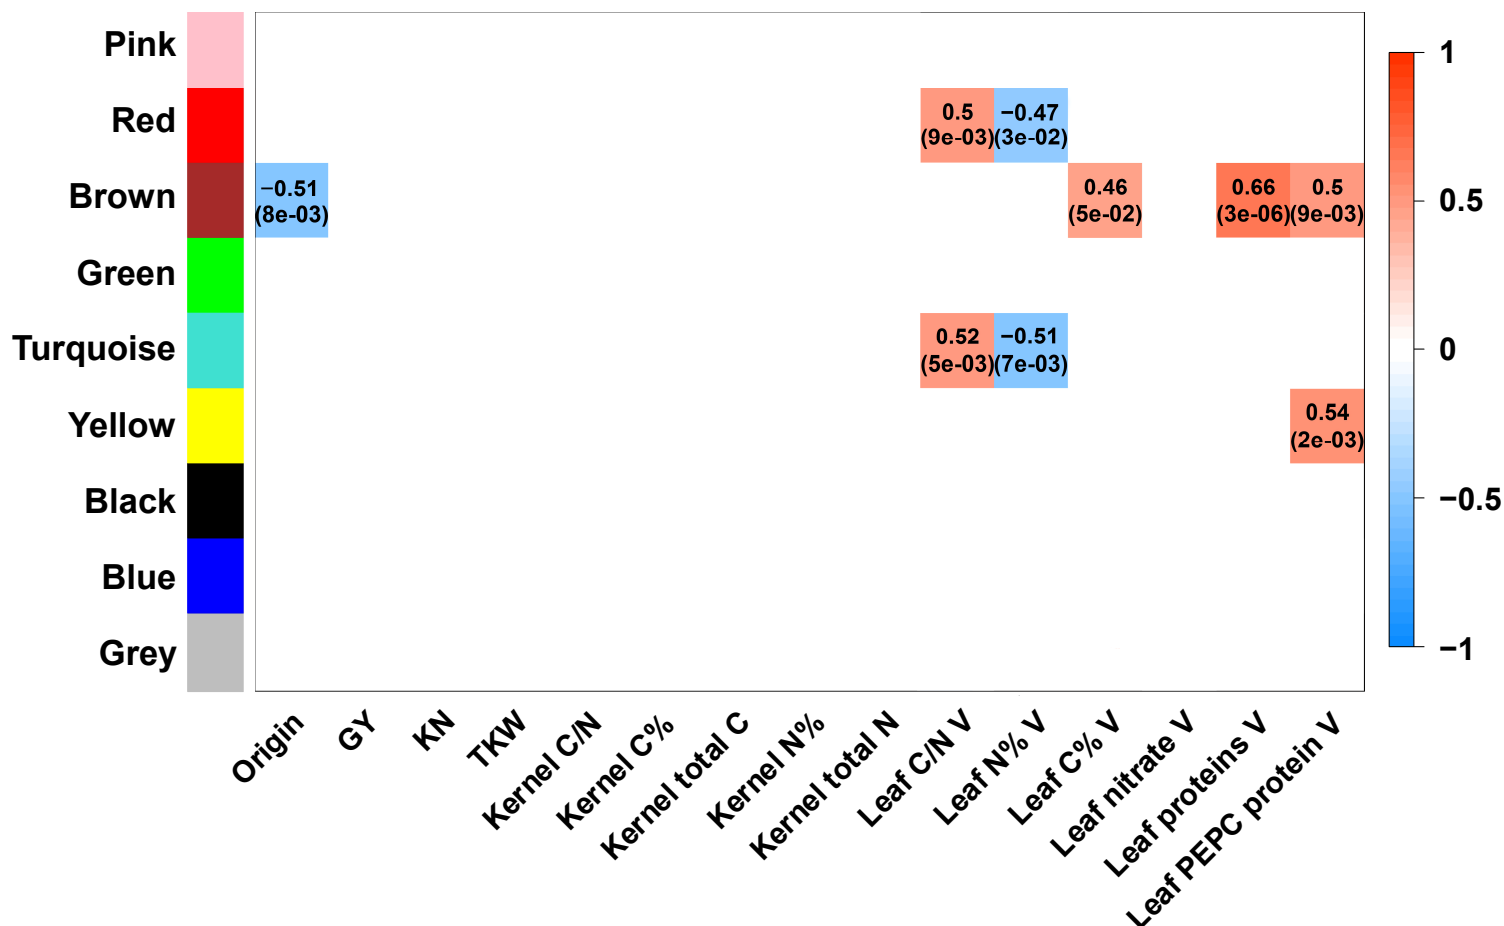

**Supplemental Figure 8.** Heatmap and Pearson correlations with the modules and agronomic traits (GY, KN and TKW) and physiological parameters representative of the kernel and leaf physiological status at the V stage. (Supports Figure 7.)

Correlations with the modules containing the generic physiological traits at the V stage. The color names correspond to the 9 modules that were obtained from the V stage metabolite and enzyme activity data set network analyses (Supplemental Data Set 10). Heatmap and Pearson correlations between modules and kernel yield traits (GY, KN and TKW) and physiological parameters representative of the kernel and leaf physiological status (C = carbon, N = nitrogen, C/N ratio, leaf soluble protein, PEPC protein and nitrate contents). Correlations were considered significant with Bonferroni Adjusted-*P*-values <0.05. Adjusted-*P*-values are shown between parentheses. Only significant negative and positive correlation coefficient values are indicated in each colored box. For clarity, only those with a correlation higher than 0.4 have been considered. The box of the heat map using the scale on the right side of the panel. e = exponent base 10. The same analysis was performed at the 15 DAS stage (Figure 7).

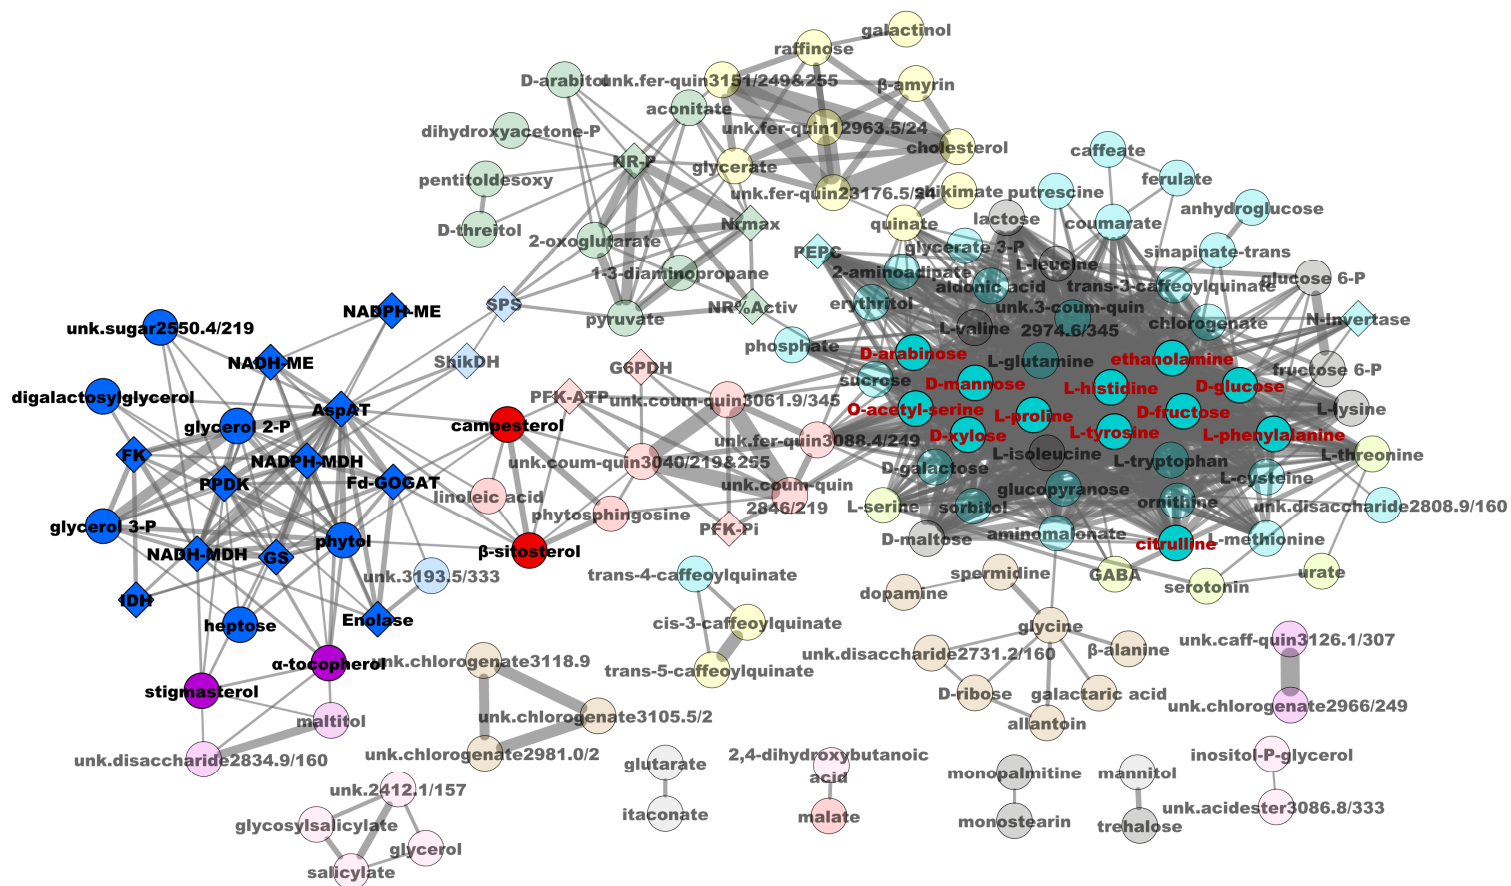

**Supplemental Figure 9.** Network diagram of relationships between leaf metabolites and enzyme activities 15 DAS.

(Supports Figure 8.)

Diamond shapes represent enzymes and circles represent metabolites. Colors of the circles and diamonds correspond to the different components within a module. The names of metabolites and enzymes positively or negatively correlated with TKW are highlighted in bold black and in red characters respectively. Only the network connections for which a topological overlap above the threshold of 0.1 are shown. Lines represent a significant correlation between two traits. Thicker lines represent the highest positive or negative correlations. The same analysis was performed at the 15 DAS stage for correlations with GY (Figure 8).

**Supplemental Table 1.** Classification of the 19 maize lines originating from Europe and America on the basis of their genetic relatedness.

(Supports Figures 2, 3, 4.)

Each line belongs to five main structural groups identified on the complete S1P9 diversity panel of 375 lines using 55 (SSR) microsatellites (Camus-Kulandaivelu et al., 2006) and further refined by Bouchet et al. (2013) by admixture based on Panzea Illumina array (SNP) on 347 lines from the S1P9 diversity panel. A value closest to 1 means that the line belongs to one of the 5 defined structural groups. T = Tropical, CBD = Corn Belt Dent, SS = Stiff Stalk, NF = Northern Flint, EF = European Flint. The colors correspond to those used in the figures.

| Name    | Pedigree                         | Country   | Geographic Origin | Breeder Groups  | Kernel Type | SSR Camus-Kulandaivelu et al., 2006 |     |     |     |     |             | SNP (Bouchet et al., 2013)         |      |     |      |     |                 |
|---------|----------------------------------|-----------|-------------------|-----------------|-------------|-------------------------------------|-----|-----|-----|-----|-------------|------------------------------------|------|-----|------|-----|-----------------|
|         |                                  |           |                   |                 |             | T                                   | CBD | SS  | NF  | EF  | Groups      | T                                  | CBD  | SS  | NF   | EF  | Groups          |
| CML254  | Pop 21, Tuxpeno Sequia           | Mexico    | Central America   | Tropical        | Semi Dent   | 98%                                 | 1%  | 0%  | 0%  | 1%  | T           | 98%                                | 2%   | 1%  | 0%   | 0%  | T               |
| CML245  | Pop 86, CO                       | Mexico    | Central America   | Tropical        | Semi Flint  | 80%                                 | 1%  | 12% | 5%  | 2%  | T           | Not analyzed due to bad genotyping |      |     |      |     |                 |
| EM1201  | Gran Amarillo Andaluz            | Spain     | Southern Europe   | Tropical        | Semi Flint  | 85%                                 | 4%  | 2%  | 1%  | 9%  | T           | 73%                                | 0%   | 0%  | 0%   | 27% | Ad T - EF       |
| ARGL256 | Double Hybrid Flint              | Argentina | Southern America  | Argentina Flint | Flint       | 92%                                 | 4%  | 1%  | 1%  | 2%  | T           | 52%                                | 3%   | 0%  | 17%  | 27% | Ad T - EF - NF  |
| P465P   | Orange Flint                     | Argentina | Southern America  | Argentina Flint | Flint       | 41%                                 | 38% | 0%  | 5%  | 17% | Ad T - CBD  | 33%                                | 49%  | 4%  | 6%   | 8%  | Ad T - CBD      |
| FV252   | F186 x Co125                     | France    | Western Europe    | Early Dent      | Dent        | 1%                                  | 97% | 1%  | 1%  | 1%  | CBD         | 0%                                 | 100% | 0%  | 0%   | 0%  | CBD             |
| MBS847  | Pioneer 3901                     | USA       | Northern America  | Iodent Dent     | Dent        | 1%                                  | 95% | 1%  | 2%  | 1%  | CBD         | 0%                                 | 97%  | 3%  | 0%   | 0%  | CBD             |
| Mo17    | CI187-2 x C103                   | USA       | Northern America  | Lancaster Dent  | Dent        | 1%                                  | 92% | 2%  | 1%  | 3%  | CBD         | 0%                                 | 99%  | 0%  | 1%   | 0%  | CBD             |
| ND283   | Haney's Minesota 13              | USA       | Northern America  | Min13 Dent      | Dent        | 3%                                  | 94% | 2%  | 1%  | 1%  | CBD         | 16%                                | 59%  | 7%  | 15%  | 3%  | Ad CBD - T/NF   |
| HP301   | Supergold                        | USA       | Northern America  | Pop-corn        | Pop         | 3%                                  | 84% | 1%  | 7%  | 5%  | CBD         | 21%                                | 39%  | 4%  | 35%  | 0%  | Ad NF - CBD - T |
| SA24    | South American                   | USA       | Northern America  | Pop-corn        | Pop         | 3%                                  | 62% | 0%  | 8%  | 27% | Ad CBD - EF | 27%                                | 33%  | 3%  | 37%  | 0%  | Ad NF - CBD - T |
| B73     | BSSC5                            | USA       | Northern America  | StiffStalk Dent | Dent        | 1%                                  | 1%  | 98% | 0%  | 1%  | SS          | 0%                                 | 14%  | 86% | 0%   | 0%  | SS              |
| C105    | Purple Flour x Early_Yellow_Dent | USA       | Northern America  | Dent            | Semi Dent   | 8%                                  | 42% | 0%  | 49% | 1%  | Ad NF-CBD   | 12%                                | 25%  | 5%  | 55%  | 3%  | Ad NF - CBD     |
| NYS302  | Black Mexican                    | USA       | Northern America  | Northern Flint  | Sweet       | 0%                                  | 1%  | 0%  | 98% | 1%  | NF          | 0%                                 | 0%   | 0%  | 100% | 0%  | NF              |
| ND36    | Manitoba Yellow Flint            | USA       | Northern America  | Northern Flint  | Flint       | 1%                                  | 1%  | 0%  | 97% | 1%  | NF          | Not analyzed due to bad genotyping |      |     |      |     |                 |
| FV2     | Lacaune                          | France    | Western Europe    | European Flint  | Flint       | 1%                                  | 0%  | 1%  | 1%  | 97% | EF          | 0%                                 | 0%   | 0%  | 8%   | 92% | EF              |
| Lo3     | Nostrano dell Isola              | Italy     | Southern Europe   | European Flint  | Flint       | 3%                                  | 1%  | 2%  | 3%  | 91% | EF          | 36%                                | 0%   | 0%  | 0%   | 64% | Ad EF - T       |
| Lo32    | Isola Basso                      | Italy     | Southern Europe   | European Flint  | Flint       | 17%                                 | 2%  | 1%  | 2%  | 79% | EF          | 38%                                | 0%   | 0%  | 0%   | 62% | Ad EF - T       |
| F64     | PI-186223 Argentina              | Argentina | Southern America  | Argentina Flint | Flint       | 15%                                 | 2%  | 1%  | 1%  | 81% | EF          | 55%                                | 2%   | 1%  | 9%   | 33% | Ad T-EF         |

The links providing information on the lines are presented below.

| Line    | USDA GenBank                                                                                                                                                              | CIMMYT GenBank                                                                                                                                        | Maize GDB                                                                                                             |
|---------|---------------------------------------------------------------------------------------------------------------------------------------------------------------------------|-------------------------------------------------------------------------------------------------------------------------------------------------------|-----------------------------------------------------------------------------------------------------------------------|
| CML254  | <a href="https://npgsweb.ars-grin.gov/gringlobal/accessiondetail.aspx?accid=PI+595542">https://npgsweb.ars-grin.gov/gringlobal/accessiondetail.aspx?accid=PI+595542</a>   | <a href="http://mgb.cimmyt.org/gringlobal/accessiondetail.aspx?id=17586">http://mgb.cimmyt.org/gringlobal/accessiondetail.aspx?id=17586</a>           | <a href="http://www.maizegdb.org/data_center/stock?id=105108">http://www.maizegdb.org/data_center/stock?id=105108</a> |
| CML245  | No                                                                                                                                                                        | <a href="http://mgb.cimmyt.org/gringlobal/AccessionObservation.aspx?id=20048">http://mgb.cimmyt.org/gringlobal/AccessionObservation.aspx?id=20048</a> | <a href="http://www.maizegdb.org/data_center/stock?id=105098">http://www.maizegdb.org/data_center/stock?id=105098</a> |
| EM1201  | No                                                                                                                                                                        | No                                                                                                                                                    | No                                                                                                                    |
| ARGL256 | No                                                                                                                                                                        | No                                                                                                                                                    | No                                                                                                                    |
| P465P   | No                                                                                                                                                                        | No                                                                                                                                                    | No                                                                                                                    |
| FV252   | No                                                                                                                                                                        | No                                                                                                                                                    | No                                                                                                                    |
| MBS847  | No                                                                                                                                                                        | No                                                                                                                                                    | No                                                                                                                    |
| Mo17    | <a href="https://npgsweb.ars-grin.gov/gringlobal/accessiondetail.aspx?id=1103586">https://npgsweb.ars-grin.gov/gringlobal/accessiondetail.aspx?id=1103586</a>             | No                                                                                                                                                    | <a href="http://www.maizegdb.org/data_center/stock?id=68498">http://www.maizegdb.org/data_center/stock?id=68498</a>   |
| ND283   | <a href="https://npgsweb.ars-grin.gov/gringlobal/accessiondetail.aspx?accid=PI+558532">https://npgsweb.ars-grin.gov/gringlobal/accessiondetail.aspx?accid=PI+558532</a>   | No                                                                                                                                                    | <a href="http://www.maizegdb.org/data_center/stock?id=47846">http://www.maizegdb.org/data_center/stock?id=47846</a>   |
| HP301   | <a href="https://npgsweb.ars-grin.gov/gringlobal/accessiondetail.aspx?accid=PI+587131">https://npgsweb.ars-grin.gov/gringlobal/accessiondetail.aspx?accid=PI+587131</a>   | No                                                                                                                                                    | <a href="http://www.maizegdb.org/data_center/stock?id=47773">http://www.maizegdb.org/data_center/stock?id=47773</a>   |
| SA24    | <a href="https://npgsweb.ars-grin.gov/gringlobal/accessiondetail.aspx?accid=Ames+27188">https://npgsweb.ars-grin.gov/gringlobal/accessiondetail.aspx?accid=Ames+27188</a> | No                                                                                                                                                    | <a href="http://www.maizegdb.org/data_center/stock?id=47916">http://www.maizegdb.org/data_center/stock?id=47916</a>   |
| B73     | <a href="https://npgsweb.ars-grin.gov/gringlobal/accessiondetail.aspx?id=1445409">https://npgsweb.ars-grin.gov/gringlobal/accessiondetail.aspx?id=1445409</a>             | No                                                                                                                                                    | <a href="http://www.maizegdb.org/data_center/stock?id=47638">http://www.maizegdb.org/data_center/stock?id=47638</a>   |
| C105    | <a href="https://npgsweb.ars-grin.gov/gringlobal/accessiondetail.aspx?accid=NSL+32721">https://npgsweb.ars-grin.gov/gringlobal/accessiondetail.aspx?accid=NSL+32721</a>   | No                                                                                                                                                    | <a href="http://www.maizegdb.org/data_center/stock?id=68505">http://www.maizegdb.org/data_center/stock?id=68505</a>   |
| NYS302  | No                                                                                                                                                                        | No                                                                                                                                                    | <a href="http://www.maizegdb.org/data_center/stock?id=70301">http://www.maizegdb.org/data_center/stock?id=70301</a>   |
| ND36    | No                                                                                                                                                                        | No                                                                                                                                                    | <a href="http://www.maizegdb.org/data_center/stock?id=68568">http://www.maizegdb.org/data_center/stock?id=68568</a>   |
| FV2     | No                                                                                                                                                                        | No                                                                                                                                                    | No                                                                                                                    |
| Lo3     | No                                                                                                                                                                        | No                                                                                                                                                    | No                                                                                                                    |
| Lo32    | No                                                                                                                                                                        | No                                                                                                                                                    | No                                                                                                                    |
| F64     | No                                                                                                                                                                        | No                                                                                                                                                    | No                                                                                                                    |

**Supplemental Table 2.** The enzymes involved in central C and N metabolism used for studying genotypic variation in their activity and for determining the metabolic changes through modelling.

(Supports Figures 4 and 8.)

Their activity was measured in 19 maize lines representative of American and European plant genetic diversity using a robot-based platform according to the protocol described by Gibon et al. (2004).

| Enzymes (abbreviation) | Full name                                 | Metabolic pathway         | Substrate                                         | Product                                                  |
|------------------------|-------------------------------------------|---------------------------|---------------------------------------------------|----------------------------------------------------------|
| PEPC                   | Phosphoenolpyruvate carboxylase           | C4 metabolism             | Phosphoenolpyruvate                               | Oxaloacetate + Pi                                        |
| PEPCK                  | Phosphoenolpyruvate carboxykinase         | C4 metabolism             | Oxaloacetate                                      | Phosphoenolpyruvate, carbon dioxide.                     |
| PPDK                   | Pyruvate, phosphate dikinase              | C4 metabolism             | ATP, pyruvate, phosphate                          | ADP, phosphoenolpyruvate, pyrophosphate                  |
| NADP-MDH               | NADP - Malate dehydrogenase               | C4 metabolism             | Malate, NADP <sup>+</sup>                         | Oxaloacetate + NADPH + H <sup>+</sup>                    |
| NAD-ME                 | NAD Malic enzyme                          | C4 metabolism             | Malate, NAD <sup>+</sup>                          | Pyruvate + CO <sub>2</sub> + H <sup>+</sup>              |
| NADP-ME                | NADP Malic enzyme                         | C4 metabolism             | Malate, NADP <sup>+</sup>                         | Pyruvate + CO <sub>2</sub> + H <sup>+</sup>              |
| N-Invertase            | Neutral Invertase                         | Carbohydrate metabolism   | Sucrose                                           | Fructose, Glucose                                        |
| GK                     | Glucokinase                               | Carbohydrate metabolism   | Glucose, ATP                                      | Glucose 6-phosphate, AMP                                 |
| SPS                    | Sucrose phosphate synthase                | Carbohydrate metabolism   | UDP-Glucose, fructose 6-phosphate, P <sub>i</sub> | UDP, sucrose 6-phosphate                                 |
| FK                     | Fructokinase                              | Carbohydrate metabolism   | Fructose, ATP                                     | Fructose 6-phosphate, AMP                                |
| F1,6BP                 | Fructose 1,6 Bisphosphatase               | Glycolysis                | Fructose-1,6-bisphosphate                         | Fructose-6-phosphate, phosphate                          |
| PFK-PPi (PFP)          | Phosphofructokinase-PPi                   | Glycolysis                | Fructose-6-phosphate, diphosphate                 | Phosphate, fructose-1,6-bisphosphate                     |
| PFK-ATP                | ATP-phosphofructokinase                   | Glycolysis                | Diphosphate, fructose-6-phosphate                 | Phosphate, fructose-1,6-bisphosphate, ATP                |
| Enolase                | Enolase                                   | Glycolysis                | 2-phosphoglycerate                                | Phosphoenolpyruvate                                      |
| Fd-GOGAT               | Glutamine 2-oxoglutarate amidotransferase | Nitrogen assimilation     | Glutamine, 2-oxoglutarate                         | Glutamate                                                |
| AlaAT                  | Alanine Aminotransferase                  | Nitrogen assimilation     | Glutamate, pyruvate                               | 2-oxoglutarate, alanine                                  |
| AspAT                  | Aspartate Aminotransferase                | Nitrogen assimilation     | Aspartate, 2-oxoglutarate                         | Oxaloacetate, glutamate                                  |
| GS                     | Glutamine synthetase                      | Nitrogen assimilation     | Glutamate, ATP, NH <sub>3</sub>                   | Glutamine, phosphate                                     |
| NAD-GDH                | NAD-Glutamate dehydrogenase               | Nitrogen metabolism       | Glutamate, NAD                                    | 2-oxoglutarate + NH <sub>3</sub> + NADH + H <sup>+</sup> |
| NRmax                  | Nitrate Reductase (maximal activity)      | Nitrogen assimilation     | Nitrate, NADH, H <sup>+</sup>                     | Nitrite, NAD                                             |
| NR-P                   | Nitrate Reductase (inactive NR)           | Nitrogen assimilation     | Nitrate, NADH, H <sup>+</sup>                     | Nitrite, NAD                                             |
| NR%                    | Nitrate Reductase (% active NR)           | Nitrogen assimilation     | Nitrate, NADH, H <sup>+</sup>                     | Nitrite, NAD                                             |
| G6PDH                  | Glucose -6 -Phosphate Dehydrogenase       | Pentose phosphate pathway | Glucose 6-phosphate, NADP <sup>+</sup>            | 6-phosphogluconate, NADPH                                |
| ShikDH                 | Shikimate Dehydrogenase                   | Shikimate pathway         | 3-dehydroshikimate, NADPH                         | Shikimate, NADP <sup>+</sup>                             |
| Aconitase              | Aconitase                                 | Tricarboxylic acid cycle  | Citrate, cis-Aconitate                            | Aconitate, isocitrate                                    |
| CS                     | Citrate synthase                          | Tricarboxylic acid cycle  | Acetyl-CoA and oxaloacetate                       | Citrate                                                  |
| IDH                    | Isocitrate dehydrogenase                  | Tricarboxylic acid cycle  | Isocitrate, NAD <sup>+</sup>                      | 2-oxoglutarate, NADH                                     |
| NAD-MDH                | NAD-Malate dehydrogenase                  | Tricarboxylic acid cycle  | Malate, NAD <sup>+</sup>                          | Oxaloacetate + NADH + H <sup>+</sup>                     |
| Fumarase               | Fumarate hydratase                        | Tricarboxylic acid cycle  | Fumarate                                          | Malate                                                   |
